# Supplementary figures and images for: Investigation of the structure of water at hydrophobic and hydrophilic interfaces by angle-resolved TIR Raman spectroscopy
Source: Royal Society of Chemistry journal article supplement (doi:10.1039/c5cp03581c), 2015-01-01

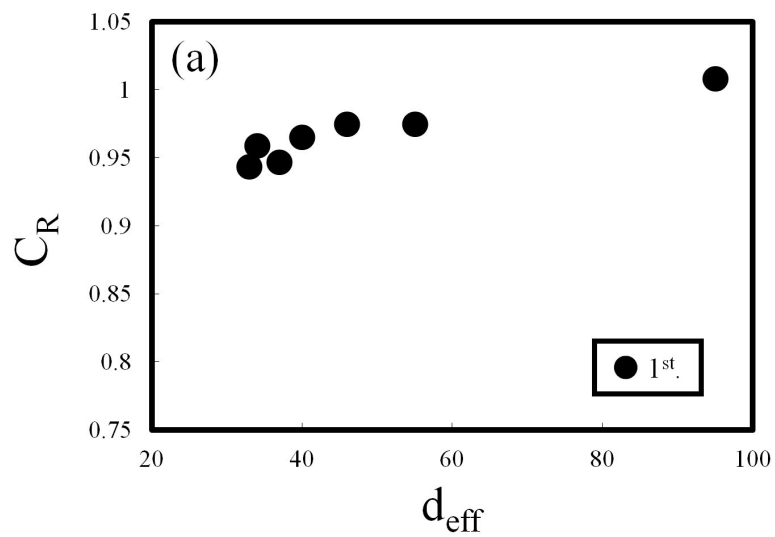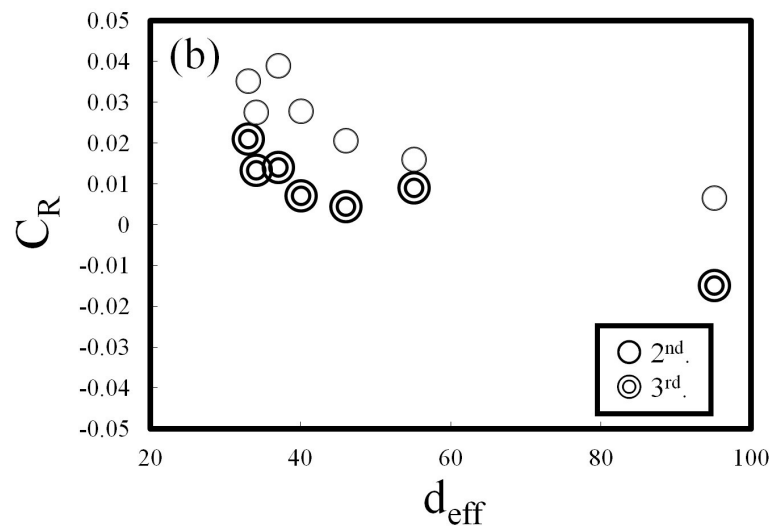

Supplement: c5cp03581c2.pdf [file c5cp03581c2.pdf]

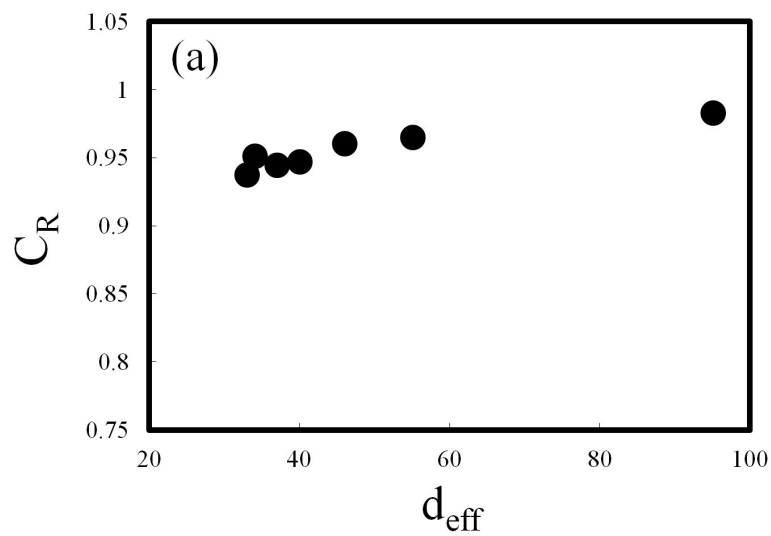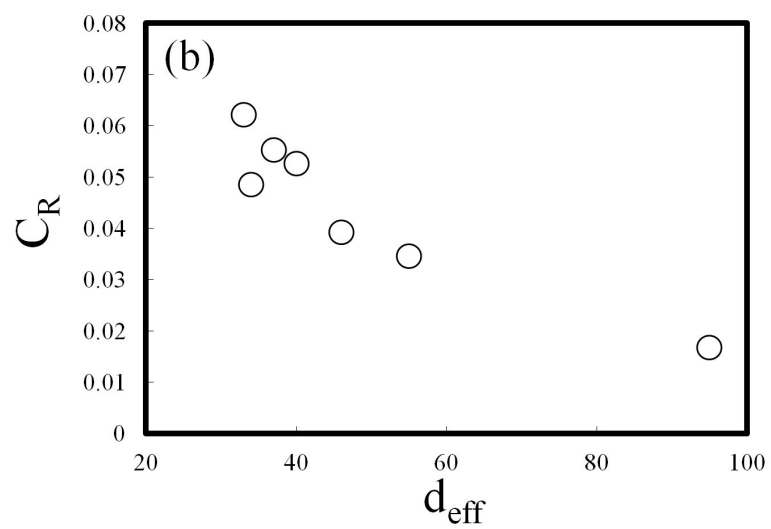

Supplement: c5cp03581c3.pdf [file c5cp03581c3.pdf]
